# Supplementary material for: Structural Basis of a Human Neutralizing Antibody Specific to the SARS-CoV-2 Spike Protein Receptor-Binding Domain
Source: PubMed Central journal article supplement (PMC8515945; doi:10.1128/spectrum.01352-21), 2021-10-13
Supplement: spectrum01352-21_supp_1_seq9.pdf [file spectrum01352-21_supp_1_seq9.pdf]

## Supplementary Table

**Table S1. Ig gene family of anti-tetanus toxin mAbs isoated.**

| Antibody ID | V <sub>H</sub>    |      |      |   |                    |                          |         | V <sub>K/L</sub>    |      |   |                    |                          |
|-------------|-------------------|------|------|---|--------------------|--------------------------|---------|---------------------|------|---|--------------------|--------------------------|
|             | V <sub>H</sub> ID | V    | D    | J | Mutation frequency | CDR3 length (No. of a.a) | Isotype | V <sub>K/L</sub> ID | V    | J | Mutation frequency | CDR3 length (No. of a.a) |
| nCoV491     | H16404            | 4-34 | 4-17 | 6 | 0.00%              | 18                       | IgA1    | K12781              | 1-16 | 1 | 0.00%              | 9                        |
| nCoV497     | H16419            | 3-30 | 1-26 | 4 | 2.08%              | 14                       | IgG1    | K12793              | 3-20 | 4 | 0.35%              | 9                        |
| nCoV501     | H16427            | 3-33 | 3-10 | 4 | 10.42%             | 11                       | IgG1    | K12801              | 3-15 | 5 | 8.96%              | 9                        |
| nCoV503     | H16431            | 3-23 | 3-16 | 4 | 3.12%              | 15                       | IgA1    | K12805              | 4-1  | 5 | 3.37%              | 9                        |
| nCoV507     | H16437            | 5-51 | 6-13 | 4 | 0.35%              | 13                       | IgG1    | K12810              | 3-20 | 2 | 0.00%              | 9                        |
| nCoV511     | H16451            | 3-48 | 2-2  | 4 | 0.69%              | 24                       | IgG1    | K12818              | 1-39 | 1 | 1.43%              | 9                        |
| nCoV514     | H16460            | 3-7  | 3-10 | 4 | 12.15%             | 12                       | IgG2    | K12823              | 2-30 | 2 | 3.74%              | 9                        |
| nCoV526     | H16497            | 4-30 | 1-14 | 3 | 14.78%             | 11                       | IgG2    | K12848              | 1-39 | 1 | 8.96%              | 9                        |
| nCoV531     | H16507            | 3-23 | 5-12 | 2 | 2.43%              | 13                       | IgG1    | K12858              | 1-39 | 5 | 1.79%              | 10                       |
| nCoV543     | H16536            | 1-2  | 3-9  | 3 | 0.69%              | 20                       | IgG1    | K12880              | 1-39 | 1 | 0.72%              | 9                        |
| nCoV549     | H16550            | 3-64 | 2-15 | 6 | 0.35%              | 12                       | IgG1    | K12892              | 3-15 | 2 | 0.72%              | 10                       |
| nCoV556     | H16565            | 1-69 | 3-22 | 5 | 0.00%              | 17                       | IgG1    | K12906              | 3-20 | 4 | 1.42%              | 9                        |
| nCoV573     | H16614            | 3-23 | 3-10 | 4 | 15.97%             | 14                       | IgA1    | K12939              | 1-39 | 5 | 9.32%              | 9                        |
| nCoV581     | H16638            | 3-7  | 2-21 | 4 | 11.11%             | 10                       | IgG2    | K12955              | 3-20 | 4 | 10.99%             | 9                        |
| nCoV591     | H16669            | 1-46 | 6-6  | 6 | 2.08%              | 20                       | IgA1    | K12975              | 2-28 | 1 | 0.68%              | 9                        |
| nCoV597     | H16686            | 3-30 | 1-26 | 4 | 1.04%              | 14                       | IgG1    | K12987              | 3-20 | 4 | 0.35%              | 9                        |
| nCoV599     | H16692            | 3-30 | 2-15 | 6 | 1.39%              | 14                       | IgG1    | K12991              | 3-20 | 1 | 2.48%              | 9                        |
| nCoV600     | H16694            | 1-69 | 2-2  | 6 | 0.35%              | 23                       | IgG1    | K12994              | 3-20 | 1 | 0.35%              | 9                        |
| nCoV602     | H16700            | 3-30 | 1-26 | 4 | 0.69%              | 13                       | IgG1    | K12997              | 1-5  | 2 | 1.43%              | 5                        |
| nCoV604     | H16710            | 4-34 | 2-2  | 3 | 0.00%              | 21                       | IgG1    | K13001              | 1-33 | 2 | 0.00%              | 9                        |
| nCoV606     | H16713            | 3-30 | 1-26 | 4 | 0.69%              | 14                       | IgG1    | K13006              | 1-5  | 3 | 1.08%              | 8                        |
| nCoV608     | H16380            | 4-30 | 3-10 | 6 | 4.47%              | 15                       | IgG1    | L5462               | 1-44 | 1 | 1.75%              | 10                       |
| nCoV617     | H16439            | 3-30 | 3-3  | 4 | 1.04%              | 16                       | IgG1    | L5478               | 1-44 | 3 | 0.70%              | 10                       |
| nCoV626     | H16487            | 1-2  | 1-1  | 4 | 6.25%              | 14                       | IgG4    | L5494               | 2-8  | 3 | 2.78%              | 10                       |
| nCoV650     | H16659            | 6-1  | 6-13 | 4 | 0.67%              | 16                       | IgG1    | L5537               | 1-40 | 3 | 0.00%              | 11                       |
| nCoV653     | H16690            | 1-2  | 1-26 | 6 | 0.35%              | 24                       | IgA1    | L5541               | 2-14 | 2 | 0.00%              | 10                       |
| nCoV654     | H16698            | 3-49 | 3-9  | 4 | 0.00%              | 22                       | IgG1    | L5543               | 4-69 | 3 | 0.00%              | 9                        |
| nCoV657     | H16708            | 3-30 | 5-18 | 4 | 0.69%              | 16                       | IgM     | L5548               | 3-21 | 2 | 1.79%              | 9                        |

**Table S2. Data collection and refinement statistics.**

|                                       | <b>SARS-CoV-2 S-RBD+nCoV617*</b>                      |
|---------------------------------------|-------------------------------------------------------|
| <b>Protein Data Bank ID</b>           | 7E3O                                                  |
| <b>Wavelength (Å)</b>                 | 0.97853                                               |
| <b>Resolution range</b>               | 40.67- 2.514 (2.603 - 2.514) **                       |
| <b>Space group</b>                    | <i>P</i> 2 <sub>1</sub> 2 <sub>1</sub> 2 <sub>1</sub> |
| <b>Unit cell</b>                      |                                                       |
| a, b, c (Å)                           | 165.093 60.367 77.296                                 |
| $\alpha$ , $\beta$ , $\gamma$ (°)     | 90, 90, 90                                            |
| <b>Unique reflections</b>             | 25491 (2495) **                                       |
| <b>Multiplicity</b>                   | 4.9                                                   |
| <b>Completeness (%)</b>               | 94.20 (95.63) **                                      |
| <b>Mean I/sigma (I)</b>               | 5.6                                                   |
| <b>Wilson B-factor</b>                | 53.99                                                 |
| <b>R-merge<sup>**</sup></b>           | 0.118                                                 |
| <b>R-meas<sup>***</sup></b>           | 0.132                                                 |
| <b>R-pim<sup>****</sup></b>           | 0.056                                                 |
| <b>CC1/2</b>                          | 0.897                                                 |
| <b>CC</b>                             | 0.973                                                 |
| <b>Reflections used in refinement</b> | 25465 (2495) **                                       |
| <b>Reflections used for R-free</b>    | 1996 (196) **                                         |
| <b>R-work<sup>#</sup></b>             | 0.2202 (0.2810) **                                    |

|                                    |                    |
|------------------------------------|--------------------|
| <b>R-free</b>                      | 0.2750 (0.3782) ** |
| <b>CC (work)</b>                   | 0.973              |
| <b>Number of nonhydrogen atoms</b> | 4751               |
| Macromolecules                     | 4697               |
| Solvent                            | 54                 |
| <b>Protein residues</b>            | 616                |
| <b>RMS (bonds) (Å)</b>             | 0.011              |
| <b>RMS (angles) (°)</b>            | 1.37               |
| <b>Ramachandran favored (%)</b>    | 92.43              |
| <b>Ramachandran allowed (%)</b>    | 6.74               |
| <b>Ramachandran outliers (%)</b>   | 0.82               |
| <b>Rotamer outliers (%)</b>        | 1.34               |
| <b>Clashscore</b>                  | 9.19               |
| <b>Average B-factor</b>            | 53.91              |
| Macromolecules                     | 53.94              |
| Solvent                            | 51.89              |

\*This dataset is collected with one crystal.

\*\*Statistics for the highest-resolution shell are shown in parentheses.

## Supplementary Figures

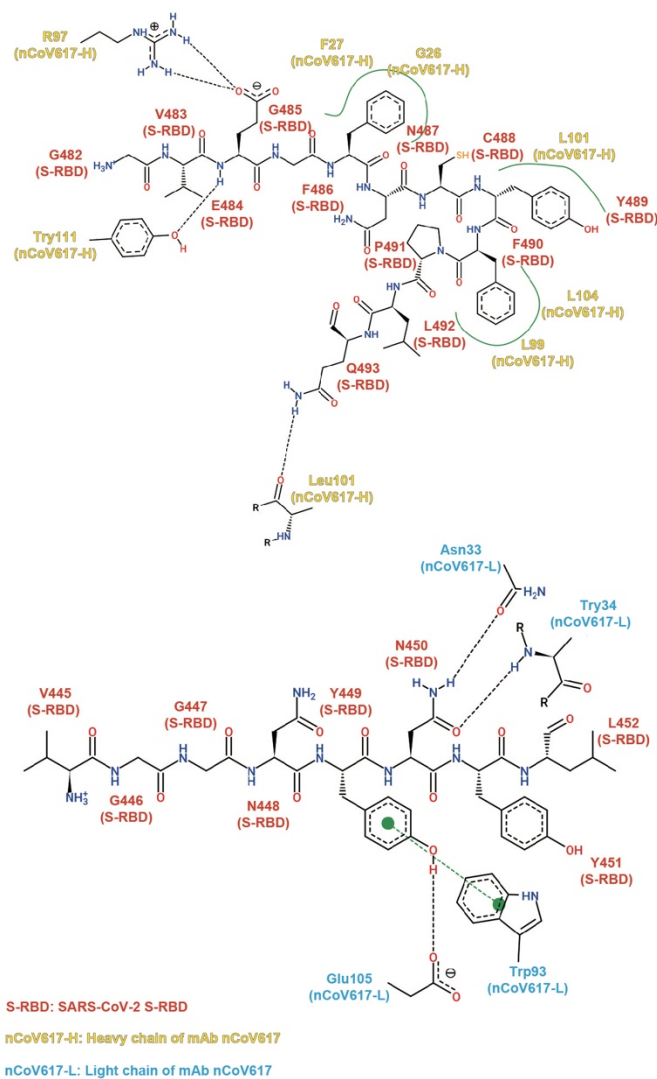

**Figure. S1:** Detail binding characterizations of residues in the complex. Residues in red color belong to SARS-CoV-2 S-RBD, in yellow color belong to heavy chain of mAb nCoV617, and in blue color belong to light chain of mAb nCoV617. Hydrogen bond is represented with black dash lines, while hydrophobic interaction is represented with green curves wrapped around the residues. The figure is generated by PoseView.

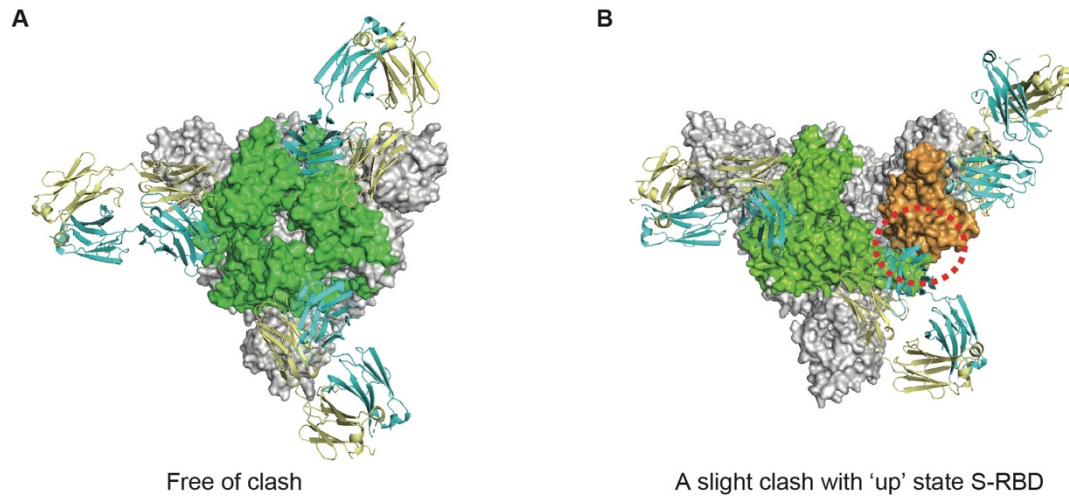

**Figure. S2:** Overall structure of nCoV617 Fab in complex with SARS-CoV-2 S protein (the 3-down(A), PDB ID: 6VXX; the 2-down-1-up(B), PDB ID: 7DF4). The green color indicate the down RBD in S protein, the orange color indicate the up RBD in S protein, the red dashed ellipse indicate the clash between nCoV617 Fab and S protein (PDB ID: 7DF4).
